# Supplementary material
Source: publisher figshare collection journal article supplement (https://geolsoc.figshare.com/ndownloader/files/34180054)
Supplement: Supplementary file 1 [file 34180054]

79 1 (Amphimedon_queenslandica,(Trichoplax_adhaerens,(Acropora_digitifera,((Ciona_intestinalis,(Danio_rerio,(Mus_musculus,Homo_sapiens)'B(0.616,1.646,1e-300,0.025)')'B(4.207,4.537,1e-300,0.025)')'B(5.1733,6.361,1e-300,0.025)',((Brachionus_sp,((Crassostrea_gigas,(Lottia_gigantea,Aplysia_californica)'B(4.702,5.315,1e-300,0.025)')'B(5.32,5.49,1e-300,0.025)',(Alvinella_pompejana,(Helobdella_robusta,Capitella_telata)'B(3.055,6.361,1e-300,0.025)')'B(4.765,6.361,1e-300,0.025)')'B(5.32,6.361,1e-300,0.025)')'B(5.5025,6.361,1e-300,0.025)',((Armorloricus_elegans,((Meiopriapulus_sp,(Priapulus_caudatus,Halicryptus_spinulosus))'L(3.069,0.05,0.153,1e-300)',(Pycnophyes_kielensis,(Echinoderes_sp,Echinoderes_horni)))'L(5.1733,0.05,0.064,1e-300)')'L(5.1733,0.05,0.064,1e-300)',(((Gordius_sp,Nectonema_munidae)'L(0.9817,0.05,0.237,1e-300)',((Xiphinema_index,(Trichuris_muris,Trichinella_spiralis))'B(1.2941,6.361,1e-300,0.025)',((Pristionchus_pacificus,Caenorhabditis_elegans)'B(1.2941,6.361,1e-300,0.025)',(Brugia_malayi,Ascaris_sum))'B(1.2941,6.361,1e-300,0.025)')'L(1.2941,0.05,0.225,1e-300)')'L(4.05,0.05,0.113,1e-300)',(((Actinarctus_doryphorus,(Echiniscus_testudo,Echiniscus_bisetosus)),(Milnesium_tardigradum,(Richtersius_coronifer,(Ramazzottius_varieornatus,Hypsibius_dujardini))))'L(0.895,0.05,0.241,1e-300)',((Epiperipatus_sp,(Peripatus_sp,Euperipatoides_kanagrensis))'L(1.42,0.05,0.22,1e-300)',(((Pycnogonum_sp,Anoplodactylus_eroticus)'B(4.298,6.361,1e-300,0.025)',(Limulus_polyphemus,((Siro_boyerae,Ixodes_scapularis),(Chaerilus_celebensis,(Acanthoscurria_gomesiana,Neoscona_arabesca)'B(2.9875,5.14,1e-300,0.025)')'B(4.3515,5.14,1e-300,0.025)')'B(4.3515,6.361,1e-300,0.025)')'B(5.005,6.361,1e-300,0.025)')'L(5.09,0.05,0.067,1e-300)',(((Scutigera_coleoptrata,(Strigamia_maritima,Lithobius_fortificatus)'B(3.827,5.21,1e-300,0.025)')'B(4.16,6.361,1e-300,0.025)',((Prostemmiulus_sp,Polydesmus_angustus),(Polyxenus_lagurus,Glomeridesmus_sp))'B(4.247,6.361,1e-300,0.025)')'B(4.247,6.361,1e-300,0.025)',((Meganyctiphanes_norvegica,(Petrolisthes_cinctipes,Litopenaeus_vannamaei)),((Xibalbanus_tumulensis,(Tigriopus_japonicus,Eurytemora_affinis)),((Artemia_francisca,(Daphnia_magna,Daphnia_pulex))'B(4.05,5.21,1e-300,0.025)',(Folsomia_candida,(Meinertellus_cundinamarcensis,((Ephemera_danica,Calopteryx_splendens)'B(3.199,5.21,1e-300,0.025)',((Tetrix_subulata,(Peruphasma_schultei,(Periplaneta_americana,Mantis_religiosa)'B(1.303,4.11,1e-300,0.025)'))'B(3.199,4.11,1e-300,0.025)',(Cercopis_vulnerata,((Gynaikothrips_ficorum,Nasonia_sp),((Platycentropus_radiatus,Parides_euridedes)'B(2.016,4.11,1e-300,0.025)',(Tribolium_castaneum,Eurelon_nostras)'B(3.069,4.11,1e-300,0.025)')'B(3.137,4.11,1e-300,0.025)')'B(3.137,4.11,1e-300,0.025)')'B(3.199,4.11,1e-300,0.025)')'B(3.199,5.21,1e-300,0.025)')'B(3.2283,5.21,1e-300,0.025)')'B(4.05,5.21,1e-300,0.025)')'B(4.05,5.21,1e-300,0.025)')))'B(5.14,6.361,1e-300,0.025)')'L(5.14,0.05,0.065,1e-300)')'L(5.14,0.05,0.065,1e-300)')'L(5.2882,0.05,0.058,1e-300)')'L(5.2882,0.05,0.058,1e-300)')'L(5.2882,0.05,0.058,1e-300)')'L(5.32,0.05,0.057,1e-300)')'B(5.5025,6.361,1e-300,0.025)')'B(5.5025,6.361,1e-300,0.025)')'B(5.5025,6.361,1e-300,0.025)'))'B(5.5025,8.33,1e-300,0.025)'; //end of file
